# Supplementary material
Source: HighWire-hosted journal article supplement (https://www.cmajopen.ca/highwire/filestream/88885/field_highwire_adjunct_files/1/open-2022-0192-2-at.pdf)
Supplement: open-2022-0192-2-at.pdf [file open-2022-0192-2-at.pdf]

**Appendix 2** Sub-categorical descriptive analysis of sociodemographic characteristics and Black medical student experiences in Canadian medical schools.

|                                                                | Negative experience | Positive experience |
|----------------------------------------------------------------|---------------------|---------------------|
| <b>Minority tax (n = 49)</b>                                   |                     |                     |
| <i>Minority tax : Gender</i>                                   |                     |                     |
| Female (n = 37)                                                | 2                   | 35                  |
| Male (n = 12)                                                  | 5                   | 7                   |
| <b>Student has experienced discrimination: no/yes (n = 49)</b> |                     |                     |
| <i>Discrimination : Year of study</i>                          |                     |                     |
| First year (n = 10)                                            | 2                   | 8                   |
| Second year (n = 12)                                           | 5                   | 7                   |
| Third year (n = 14)                                            | 10                  | 4                   |
| Fourth year (n = 6)                                            | 6                   | 0                   |
| PGY1 (n = 7)                                                   | 7                   | 0                   |
| <b>Career advancement (n = 41)</b>                             |                     |                     |
| <i>Career advancement : Year of study</i>                      |                     |                     |
| First year (n = 10)                                            | 9                   | 0                   |
| Second year (n = 12)                                           | 8                   | 1                   |
| Third year (n = 14)                                            | 12                  | 1                   |
| Fourth year (n = 6)                                            | 2                   | 3                   |
| PGY1 (n = 7)                                                   | 4                   | 1                   |
